# Supplementary material
Source: MDPI journal article supplement (https://www.mdpi.com/2072-4292/8/9/706)
Supplement: s1 [file s1]

# Monitoring Agronomic Parameters of Winter Wheat Crops with Low-Cost UAV Imagery

Michael Schirrmann <sup>1,\*</sup>, Antje Giebel <sup>1</sup>, Franziska Gleiniger <sup>1</sup>, Michael Pflanz <sup>1,2</sup>, Jan Lentschke <sup>3</sup> and Karl-Heinz Dammer <sup>1</sup>

**File\_S1.csv.** The data of the extracted image variables and the crop parameter are given as a semicolon-separated data file.

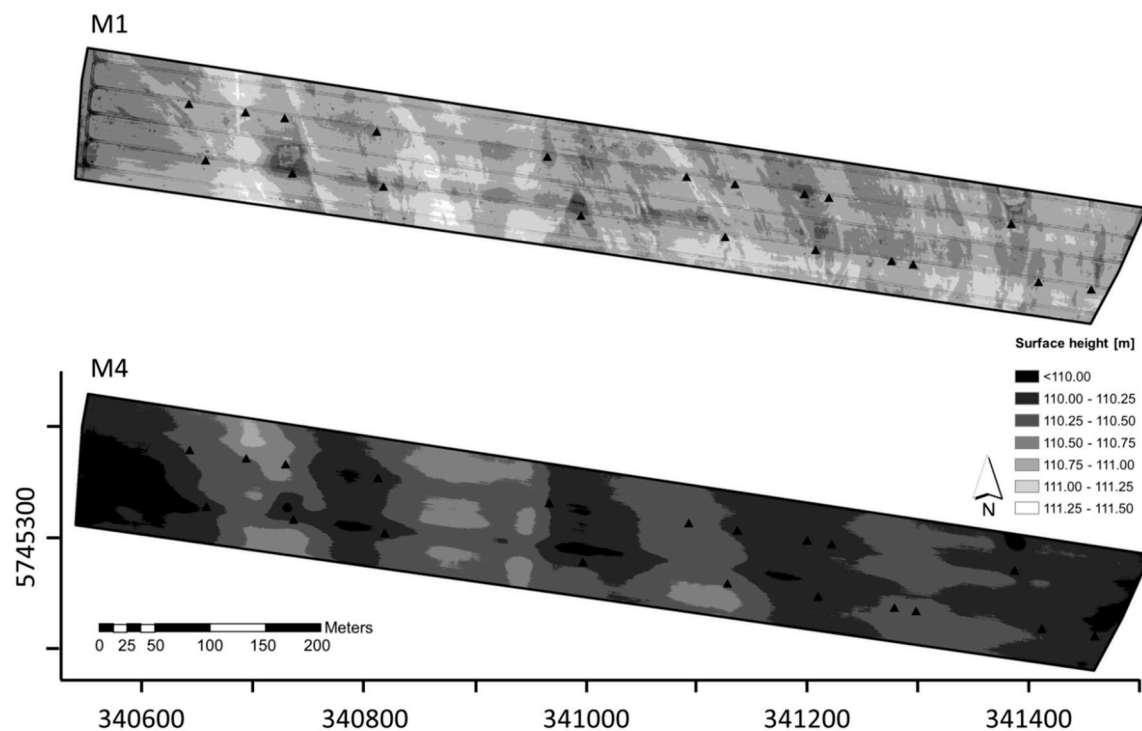

**Figure S1.** Surface models derived from UAV images with 60% overlap. M1 shows the wheat canopy heights at BBCH 41-47, and M4 shows the surface heights of the tilled soil.

**Table S1.** Results of research studies relating UAV imagery with some agronomic parameters of wheat crops.

| Target                  | Sensor                      | Total Area of Remote Sensing (ha) | VI/model                             | Altitude (m) | Coefficient of Determination (R <sup>2</sup> ) | Reference                    |
|-------------------------|-----------------------------|-----------------------------------|--------------------------------------|--------------|------------------------------------------------|------------------------------|
| biomass (t/ha)          | RGB-Camera                  | 0.073                             | RGBVI                                | 60           | 0                                              | Possoch et al., 2016 [33]    |
|                         |                             |                                   | RGBVI (hyperspectral)                | 60           | 0.09                                           |                              |
|                         |                             |                                   | Crop surface model (CSM)             | 13...16      | up to 0.64                                     |                              |
|                         |                             |                                   | Plant height model (CSH)             | 13...16      | 0.62                                           |                              |
| biomass (kg/ha)         | Fabry-Perot-Camera (FPI)    | 2.926                             | NDVI                                 | 140          | 0.59                                           | Honkavaara et al., 2013 [32] |
| biomass (kg/ha)         | Fabry-Perot-Camera          | 0.005                             | FVA<br>NDVI                          | 140*         | 0.81 (R)<br>0.63                               | Pölönen et al., 2013 [31]    |
| biomass (kg/m²)         | RGB-Camera                  | 0.114                             | CSM                                  | 186          | up to 0.72                                     | Bendig et al., 2014 [30]     |
| Grain yield             | CropScan                    | 0.416                             | powered partial least squares (PPLS) | 1.5          | 0.98                                           | Overgaard et al., 2010 [39]  |
|                         | FieldSpec 3                 |                                   |                                      | 1.5          | 0.96                                           |                              |
|                         | HyperSpex                   |                                   |                                      | 1000         | 0.95                                           |                              |
| total nitrogen (uptake) | RGB-Camera                  | 0.048                             | NDVI                                 | 50           | 0.93                                           | Caturegli et al., 2016 [40]  |
| total nitrogen (uptake) | Greenseeker                 | 0.00008                           | NDVI                                 | 1.5          | 0.91                                           |                              |
| total nitrogen          | Hyperspectrometer           | 1.638                             | NDVI                                 | >50          | 0.44                                           | Yunxia et al., 2005 [41]     |
|                         | RGB-Camera                  |                                   | DVI                                  |              | 0.43                                           |                              |
|                         |                             |                                   | R/(R+G+B)                            |              | 0.76                                           |                              |
| total nitrogen          | Fabry-Perot-Camera          | 0.005                             | NDVI                                 | 140*         | 0.69 (R not R²)                                | Pölönen et al., 2013 [31]    |
|                         |                             | 0.005                             | FVA                                  |              | 0.72 (R not R²)                                |                              |
| total nitrogen (uptake) | RGB-Camera                  | 0.255                             | (G)NDVI                              | 20...100     | 0.92                                           | Lelong et al., 2008 [35]     |
| LAI                     | Hyperspectrometer/<br>LiCor | 0.0004                            | difference spectral index (DSI)      | 1.3          | 0.8                                            | Tanaka et al., 2015 [37]     |
|                         |                             |                                   | RSI                                  |              | 0.7                                            |                              |
|                         |                             |                                   | NDSI (similar to NDVI)               |              | 0.6                                            |                              |
| LAI                     | NIR-GREEN-BLUE camera       | 10                                | NDVI                                 | 210          | 0.85                                           | Hunt et al., 2015 [34]       |
| LAI                     | RGB-Camera                  | 0.19                              | SfM model                            | 100...200    | 0.57                                           | Mathews et al., 2013 [36]    |
| LAI                     | RGB-Camera                  | not specified                     | GAI                                  | 150          | 0.98                                           | Verger et al., 2011 [38]     |
| LAI                     | RGB-Camera                  | 0.255                             | NDVI                                 | 20...100     | 0.82                                           | Lelong et al., 2008 [35]     |

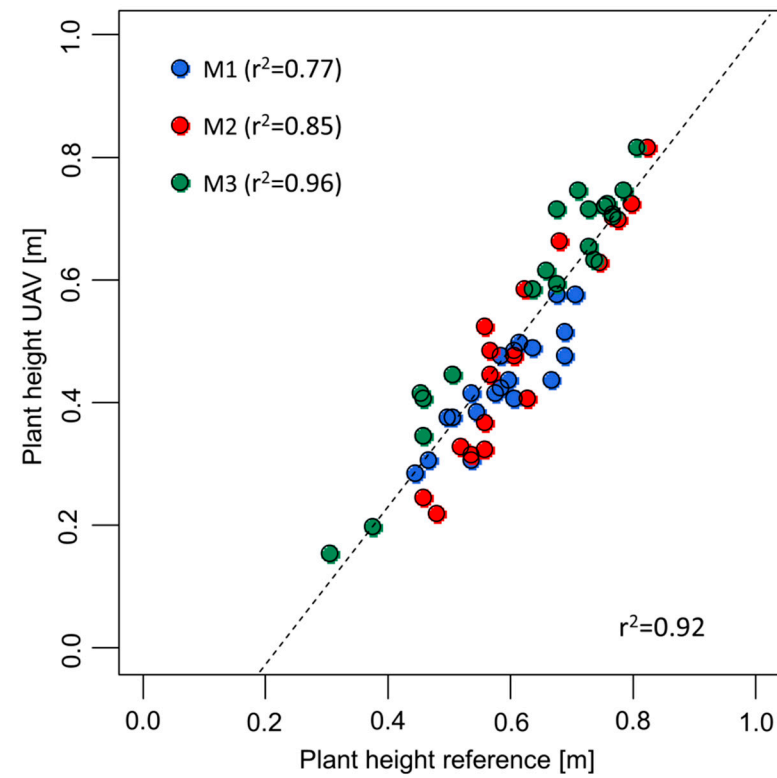

**Figure S2.** Scatter plot of the plant heights calculated from the surface models and the plant height measurements at the reference plots. Data were pooled from M1-3. The correlation coefficient (Pearson) was significant at  $p < 0.001$ .

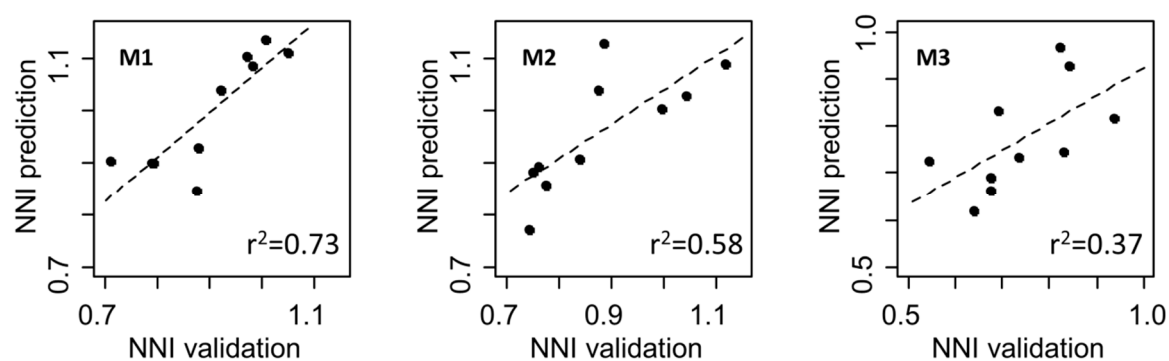

**Figure S3.** Scatter plots of the predictions and validations for the nitrogen nutrition index (NNI).

BRDF effects,  
flight direction 1

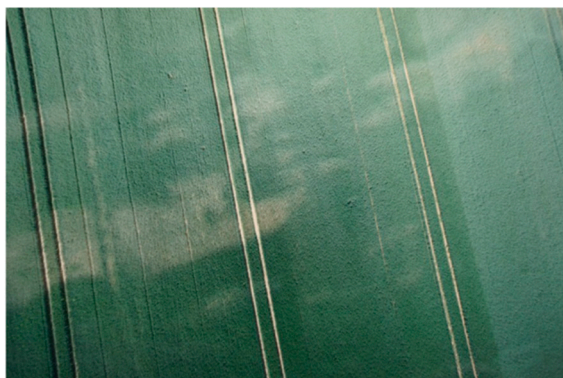

BRDF effects,  
flight direction 2

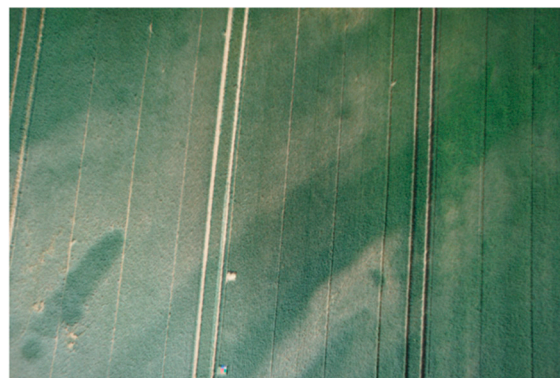

After vignetting correction+ BRDF correction

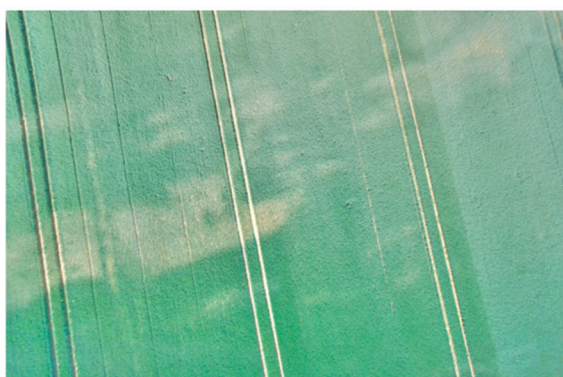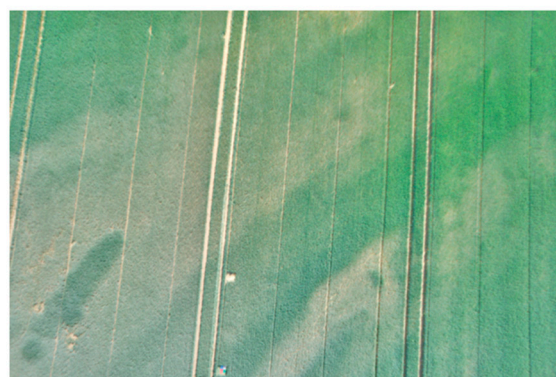

**Figure S4.** UAV TIFF images before (top) and after pre-processing (bottom).

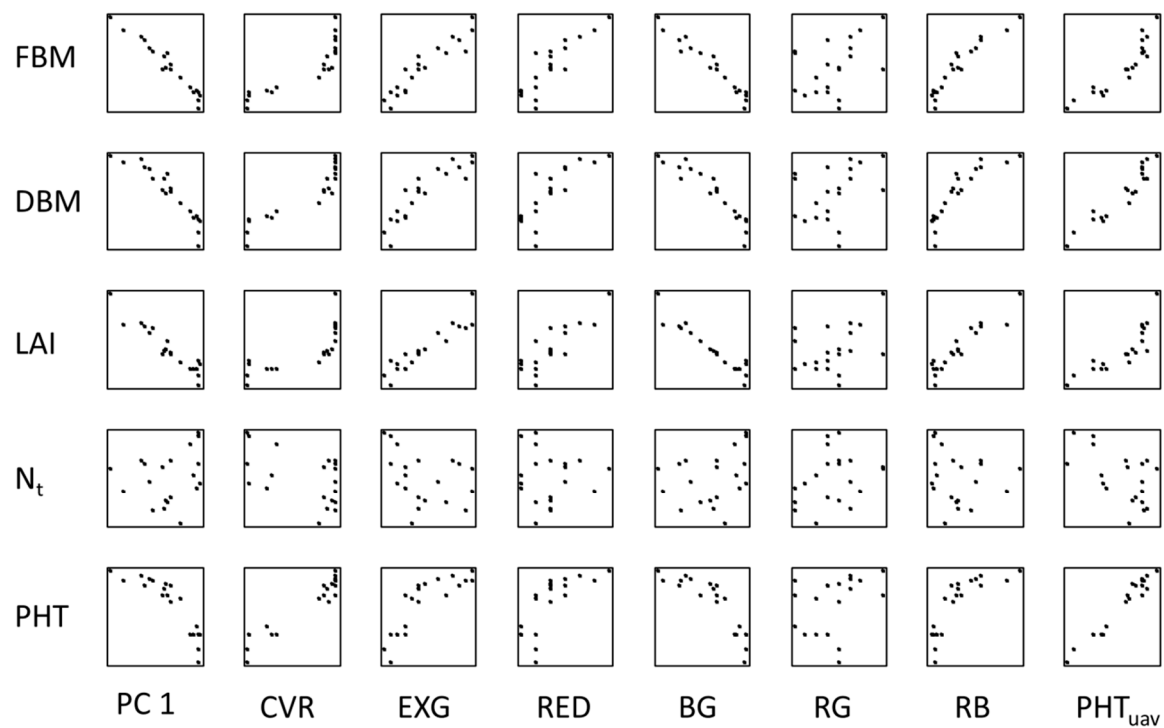

**Figure S5.** Scatter plot matrix showing the relationship between the image variables and PC 1 with the crop parameters.
